# Supplementary material for: Improved photo-luminescence behaviour of Eu3+ activated CaMoO4 nanoparticles via Zn2+ incorporation
Source: Royal Society of Chemistry journal article supplement (doi:10.1039/c5ra06692a), 2015-01-01
Supplement: c5ra06692a1.pdf [file c5ra06692a1.pdf]

## Electronic Supplementary Information (ESI) Improved photoluminescence behaviour of $\text{Eu}^{3+}$ activated $\text{CaMoO}_4$ Nanoparticles via $\text{Zn}^{2+}$ incorporation

B. P. Singh,<sup>a\*</sup> Maheshwary,<sup>b</sup> P. V. Ramakrishna,<sup>c</sup> Saurabh Singh,<sup>a</sup> V. K. Sonu,<sup>d</sup> Santosh Singh,<sup>e</sup> P. Singh,<sup>a</sup> A. Bahadur,<sup>f</sup> R. A. Singh<sup>b</sup> and S. B. Rai<sup>f</sup>

<sup>a</sup>Department of Physics, IIT (BHU), Varanasi-221005, India.

<sup>b</sup>Department of Physics, Dr. H. S. Gour Central University, Sagar- M. P.-470003, India.

<sup>c</sup>Department of Physics, Andhra University, Visakhapatnam -530003, India.

<sup>d</sup>Centre for Advanced Studies in Chemistry, North Eastern Hill University, Shillong-793022, India

<sup>e</sup>Department of Pure and Applied Physics, Guru Ghasidas University, Bilaspur -495009, India.

<sup>f</sup>Department of Physics, Banaras Hindu University, Varanasi-221005, India.

\*Corresponding Author: [bheeshmapratap@gmail.com](mailto:bheeshmapratap@gmail.com), [bpsingh.rs.app@itbhu.ac.in](mailto:bpsingh.rs.app@itbhu.ac.in)

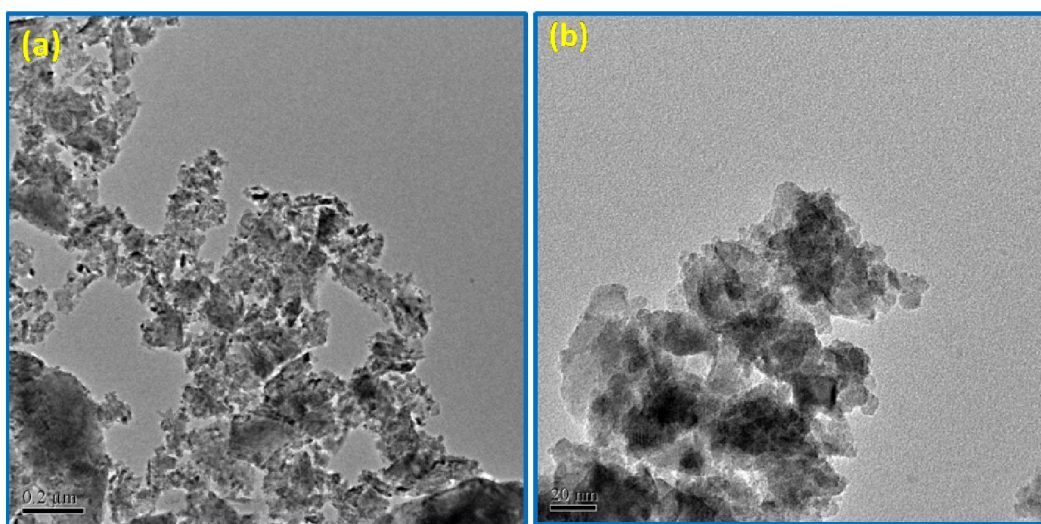

Fig.S1 TEM image of ASP  $\text{CaMoO}_4:\text{Eu}$  (a)  $\text{Zn}^{2+}$  free and (b) 2 at.%  $\text{Zn}^{2+}$  ion.

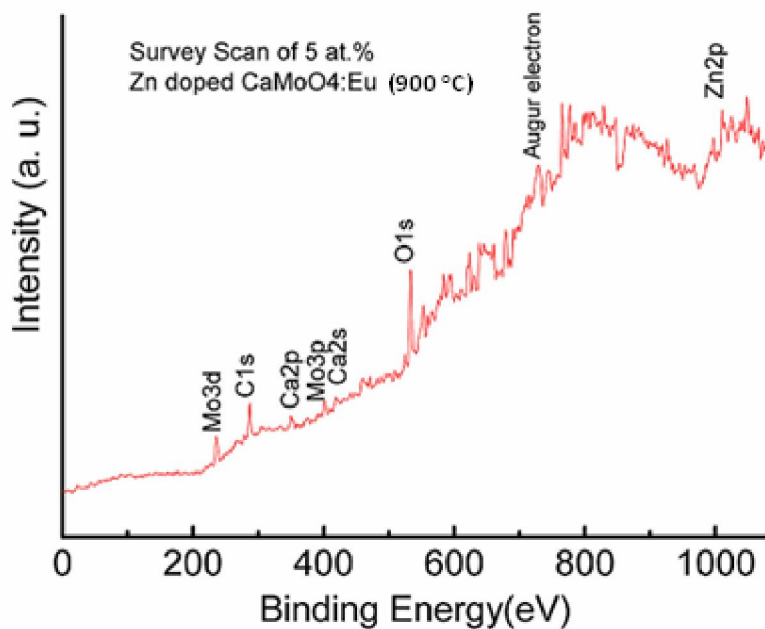

Fig.S2 XPS spectrum comprising of core BE levels of Ca, Mo, O, Eu/Zn

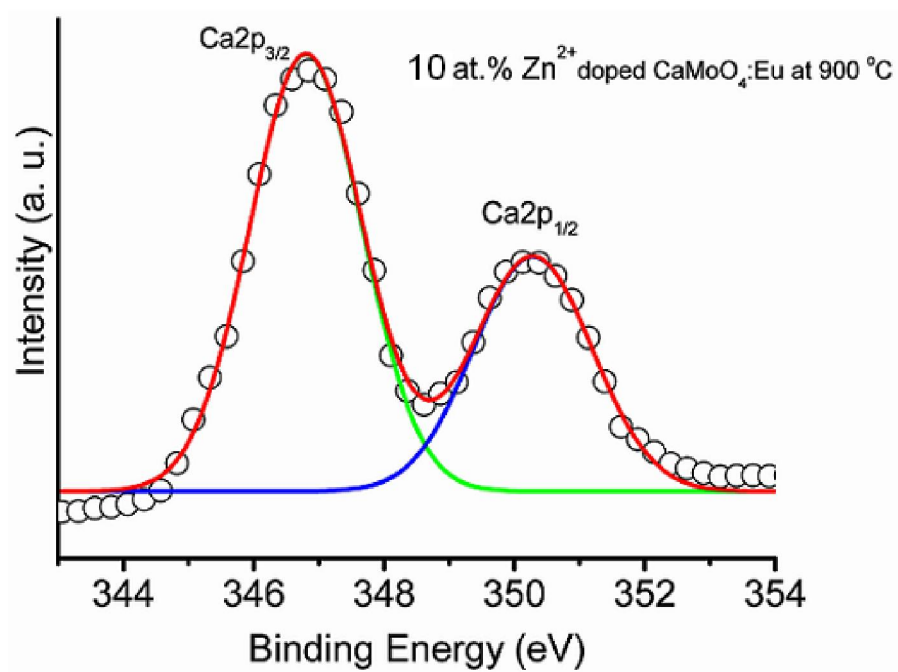

Fig.S3 De-convoluted Gaussian fitting of Ca2p peaks in XPS spectrum.

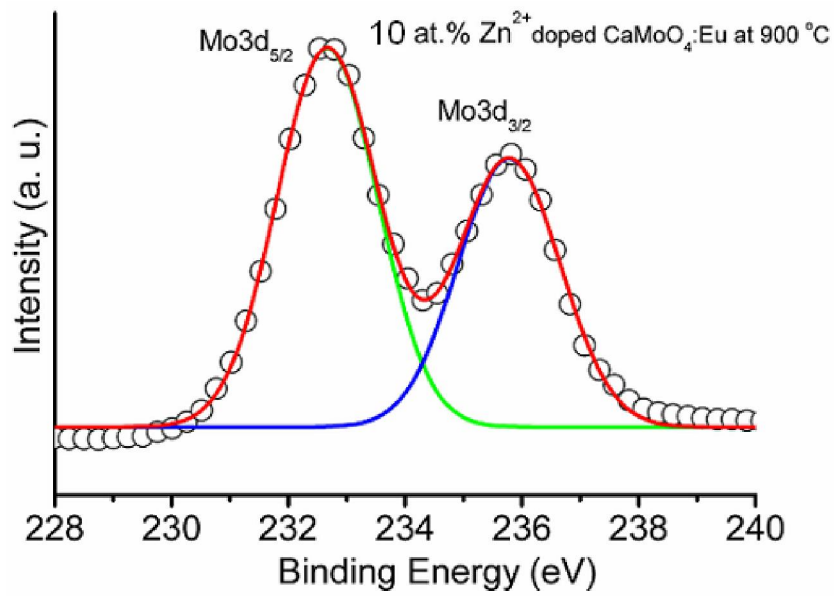

Fig.S4 De-convoluted Gaussian fitting of Mo3d peaks in XPS spectrum.

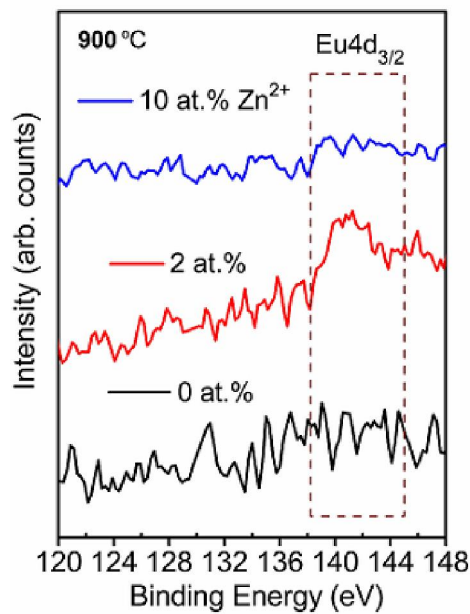

Fig.S5 XPS spectra of  $\text{Eu}^{3+}$  ion with  $\text{Zn}^{2+}$  (0, 2 and 10 at.%) concentration for 900 °C annealed samples in  $\text{CaMoO}_4:\text{Eu}$ .

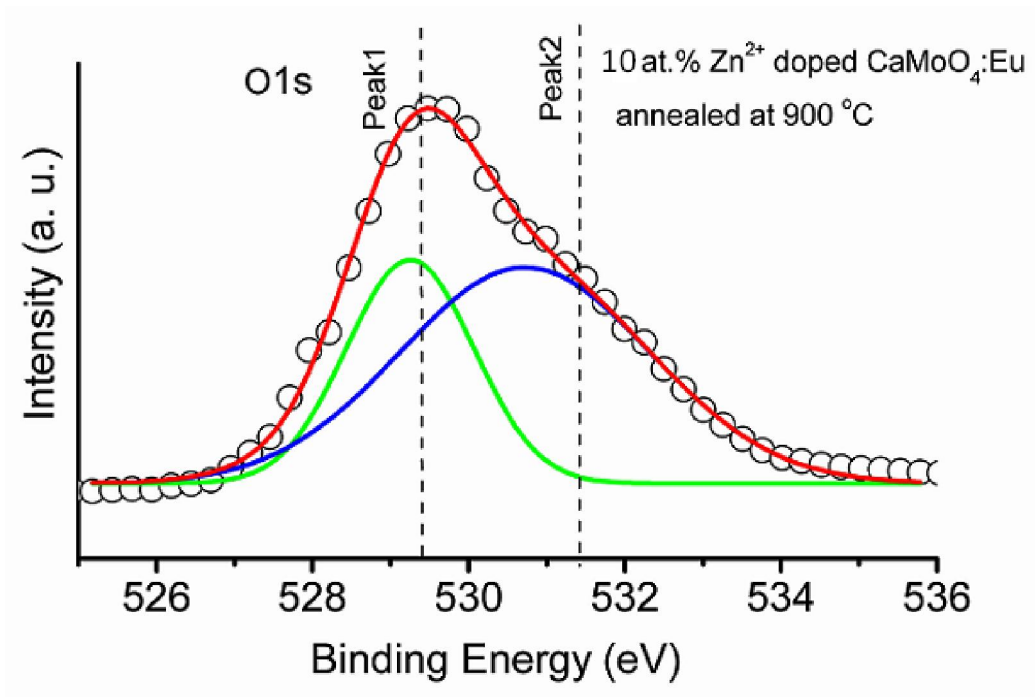

Fig.S6 De-convoluted peaks fitting of O1s XPS spectrum.

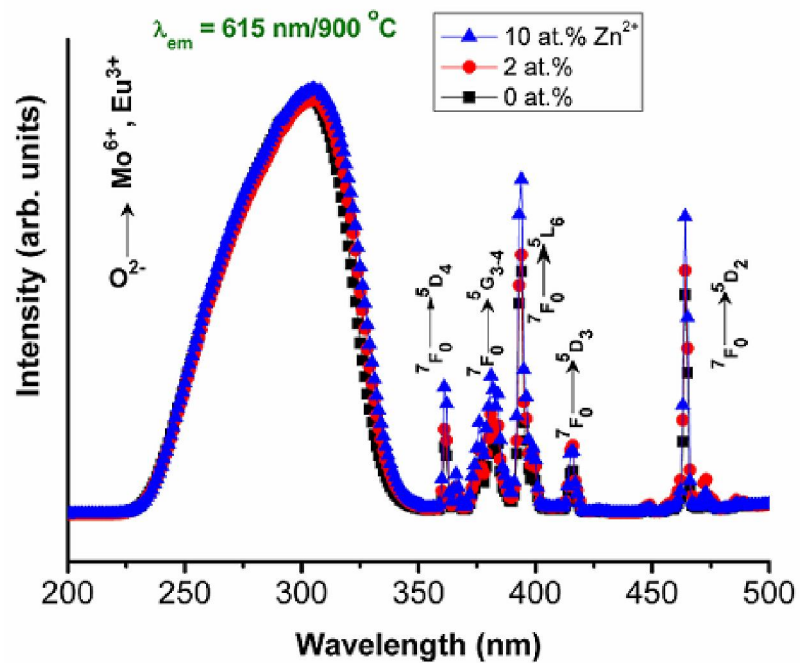

Fig.S7 Excitation spectra of Zn (0, 2, and 10 at.%) co-doped CaMoO<sub>4</sub>:Eu nanophosphors annealed at 900 °C samples at 615 nm emission wavelength.

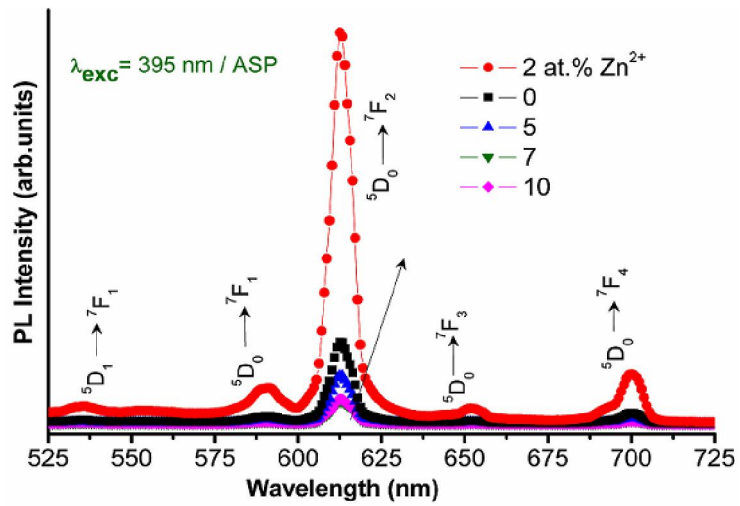

Fig.S8 Emission spectra of Zn<sup>2+</sup> (0, 2, 5, 7 and 10 at.%) co-doped CaMoO<sub>4</sub>:Eu for ASP samples at 395 nm excitation wavelength.

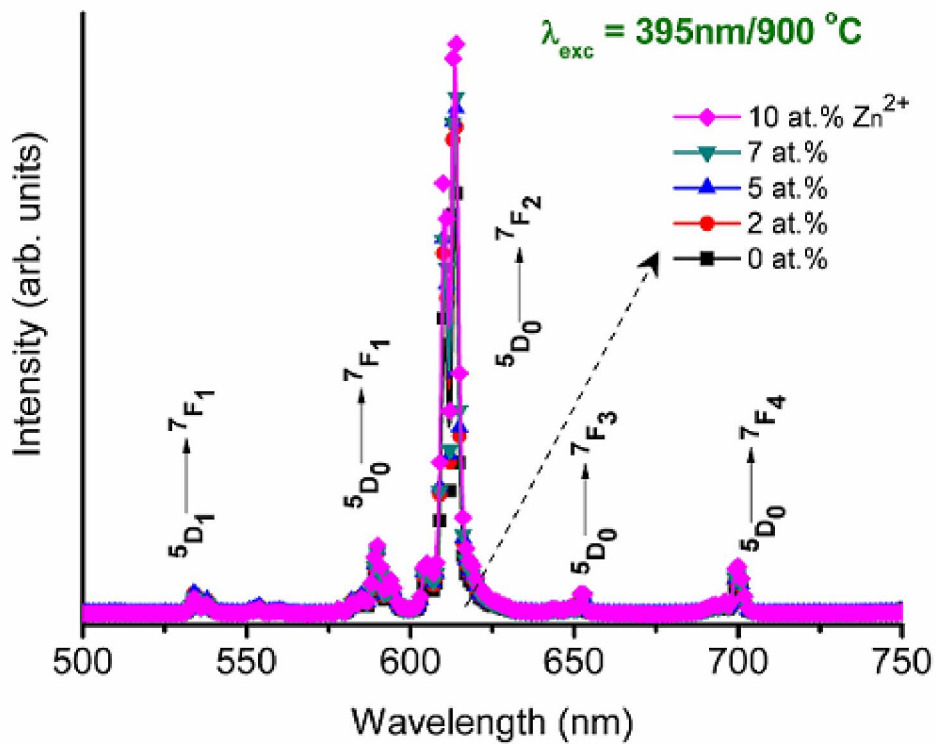

Fig. S9 Emission spectra of Zn<sup>2+</sup> (0, 2, 5, 7 and 10 at.%) doped CaMoO<sub>4</sub>:Eu under 395 nm excitation annealed at 900 °C samples.

**Table S1:** Lattice parameters of Zn<sup>2+</sup> co-doped CaMoO<sub>4</sub>:Eu for ASP and 900 °C annealed samples

| Samples                   | Zn <sup>2+</sup> (at.%) | Cell Parameters |        | Cell volume (Å <sup>3</sup> ) | Crystal size (nm) |
|---------------------------|-------------------------|-----------------|--------|-------------------------------|-------------------|
|                           |                         | a = b(Å)        | c(Å)   |                               |                   |
| <b>JCPDS 29-0351</b>      |                         |                 |        |                               |                   |
|                           | 0                       | 5.227           | 11.456 | 313.07                        | 23.7              |
|                           | 2                       | 5.230           | 11.462 | 313.56                        | 27.2              |
| <b>As-prepared</b>        | 5                       | 5.224           | 11.487 | 313.51                        | 32.1              |
|                           | 7                       | 5.227           | 11.472 | 313.46                        | 36.0              |
|                           | 10                      | 5.226           | 11.471 | 313.45                        | 37.4              |
| <b>Annealed at 900 °C</b> | 0                       | 5.229           | 11.441 | 312.90                        | 26.0              |
|                           | 2                       | 5.229           | 11.442 | 312.95                        | 30.4              |
|                           | 5                       | 5.230           | 11.440 | 312.89                        | 36.3              |
|                           | 7                       | 5.224           | 11.448 | 312.53                        | 40.3              |
|                           | 10                      | 5.225           | 11.448 | 312.61                        | 48.4              |

**Table S2** CIE values for Zn<sup>2+</sup> (Zn<sup>2+</sup> = 0, 2, 5, 7, 10 at.%) co-doped CaMoO<sub>4</sub>:Eu<sup>3+</sup> nanophosphors under 266 and 395 nm excitation wavelengths.

| Excitation (nm) | Zn <sup>2+</sup> (at.%) | CIE Coordinates |      |      |                   |      |      |
|-----------------|-------------------------|-----------------|------|------|-------------------|------|------|
|                 |                         | As-prepared     |      |      | Annealed (900 °C) |      |      |
|                 |                         | No              | X    | Y    | No                | X    | Y    |
| <b>266 nm</b>   | 0                       | a1              | 0.54 | 0.35 | x1                | 0.58 | 0.36 |
|                 | 2                       | a2              | 0.53 | 0.36 | x2                | 0.64 | 0.35 |
|                 | 5                       | a3              | 0.57 | 0.34 | x3                | 0.65 | 0.34 |
|                 | 7                       | a4              | 0.56 | 0.33 | x4                | 0.64 | 0.35 |
|                 | 10                      | a5              | 0.58 | 0.34 | x5                | 0.64 | 0.35 |
| <b>395 nm</b>   | 0                       | b1              | 0.56 | 0.35 | y1                | 0.59 | 0.36 |
|                 | 2                       | b2              | 0.55 | 0.34 | y2                | 0.61 | 0.36 |
|                 | 5                       | b3              | 0.54 | 0.33 | y3                | 0.62 | 0.36 |
|                 | 7                       | b4              | 0.53 | 0.35 | y4                | 0.62 | 0.36 |
|                 | 10                      | b5              | 0.56 | 0.32 | y5                | 0.60 | 0.35 |
